# Supplementary material
Source: publisher site journal article supplement (https://www.dovepress.com/article/299806)
Supplement: Supplementary file 1 [file get_supplementary_file.php]

**Supplementary file 1. The 127 cases presenting fetal echogenic bowel along with other ultrasound abnormalities**

| **Case number** | **Fetal echogenic bowel** | **Other ultrasound abnormalities** |
| --- | --- | --- |
| 1 | Fetal echogenic bowel | Fetal growth restriction |
| 2 | Fetal echogenic bowel | Tricuspid regurgitation |
| 3 | Fetal echogenic bowel | Biateral brain ventricular broadening |
| 4 | Local fetal echogenic bowel | Fetal biparietal diameter and head circumstance smaller for gestational age, high heart rate, hyperechoic left ventricle and tricuspid regurgitation |
| 5 | Local fetal echogenic bowel | Fetal biparietal diameter and head circumstance smaller for gestational age, high heart rate, hyperechoic left ventricle and tricuspid regurgitation |
| 6 | Fetal echogenic bowel | Abnormal amniotic fluid |
| 7 | Echogenicity of partial fetal bowel | Hyperechoic left ventricle |
| 8 | Fetal echogenic bowel | Fetal nuchal translucency of 2.7 mm, a few peritoneal effusion and small gastric bubble |
| 9 | Fetal echogenic bowel | Fetal left ventricular broadening and pericardial effusion |
| 10 | Fetal echogenic bowel | Separation of left renal pelvis |
| 11 | Local fetal echogenic bowel | Hyperechoic left ventricle |
| 12 | Echogenicity of partial fetal bowel | Fetal cardiac enlargement and a few pericardial effusion |
| 13 | Fetal echogenic bowel | Fetal nuchal translucency of 3 mm |
| 14 | Fetal echogenic bowel | Broadening of posterior fossa cisterns |
| 15 | Fetal echogenic bowel | Fetal ventricular septal defects and separation of left renal pelvis |
| 16 | Fetal echogenic bowel | Fetal ventricular septal defects and tricuspid regurgitation |
| 17 | Fetal echogenic bowel | Tricuspid regurgitation |
| 18 | Fetal echogenic bowel | Fetal nuchal translucency broadening and mild tricuspid regurgitation |
| 19 | Local fetal echogenic bowel | Bilateral renal pelvis dilatation |
| 20 | Fetal echogenic bowel | Increased cardiothoracic ratio, hyperechoic left ventricle, overlapping fingers of the right hand, and separation of renal collection system |
| 21 | Echogenicity of partial fetal bowel | Hyperechoic left ventricle and echogenicity of renal cortex |
| 22 | Fetal echogenic bowel | Fetal right ventricular broadening, suspected ventricular septal defects and tricuspid regurgitation |
| 23 | Fetal echogenic bowel | Abdominal circumference and femur length smaller for gestational age, and arrhythmia |
| 24 | Echogenicity of partial fetal bowel | Lateral ventricular broadening |
| 25 | Fetal echogenic bowel | Hyperechoic left ventricle |
| 26 | Fetal echogenic bowel | Fetal ventricular septal defects, oligohydramnios, tricuspid regurgitation and a few pericardial effusion |
| 27 | Fetal echogenic bowel | Fetal growth restriction and polyhydramnios |
| 28 | Fetal echogenic bowel | Tricuspid regurgitation |
| 29 | Local fetal echogenic bowel | Fetal biparietal diameter and head circumstance smaller for gestational age, and persistent left superior vena cava |
| 30 | Fetal echogenic bowel | Fetal ventricular septal defects, hyperechoic left ventricle and left choroid plexus cyst |
| 31 | Fetal echogenic bowel | Fetal growth restriction |
| 32 | Local fetal echogenic bowel | Hypoplasia of fetal nasal bone |
| 33 | Fetal echogenic bowel | Polyhydramnios and hyperechoic left ventricle |
| 34 | Fetal echogenic bowel | Hyperechoic left ventricle |
| 35 | Fetal echogenic bowel | Small fetal gallbladder and tricuspid regurgitation |
| 36 | Fetal echogenic bowel | Gallbladder enlargement |
| 37 | Fetal echogenic bowel | Fetal right ventricular broadening, and tricuspid regurgitation |
| 38 | Local fetal echogenic bowel | Arrhythmia and tricuspid regurgitation |
| 39 | Fetal echogenic bowel | Fetal hydrocephalus, cheilopalatognathus and hypoplasia of nasal bone |
| 40 | Fetal echogenic bowel | Polyhydramnios |
| 41 | Fetal echogenic bowel | Fetal growth restriction, fetal ventricular septal defects, aortic stenosis and hypoplasia or absence of left kidney |
| 42 | Fetal echogenic bowel | Tricuspid regurgitation |
| 43 | Fetal echogenic bowel | Peritoneal effusions and widening of the inner abdominal segment of umbilical vein |
| 44 | Local fetal echogenic bowel | Left choroid plexus cyst |
| 45 | Fetal echogenic bowel | Fetal ventricular septal defects |
| 46 | Fetal echogenic bowel | Fetal ventricular septal defects |
| 47 | Fetal echogenic bowel | Placental Lakes |
| 48 | Fetal echogenic bowel | Hyperechoic left ventricle |
| 49 | Fetal echogenic bowel | Fetal growth restriction |
| 50 | Fetal echogenic bowel | Tricuspid regurgitation |
| 51 | Fetal echogenic bowel | Fetal ventricular septal defects and tricuspid regurgitation |
| 52 | Fetal echogenic bowel | Unclear nasal bone |
| 53 | Fetal echogenic bowel | Fetal femur length smaller than 2SD |
| 54 | Fetal echogenic bowel | Peritoneal effusions, high heart rate, mitral regurgitation and tricuspid regurgitation |
| 55 | Echogenicity of partial fetal bowel | Fetal biparietal diameter smaller than 2SD |
| 56 | Echogenicity of partial fetal bowel | Bilateral ventricular dilatation and left pyelectasis |
| 57 | Fetal echogenic bowel | Fetal tricuspid regurgitation |
| 58 | Fetal echogenic bowel | Fetal gallbladder enlargement |
| 59 | Echogenicity of partial fetal bowel | Fetal pericardial effusion and bilateral renal parenchyma echogenicity |
| 60 | Fetal echogenic bowel | Translocation of left thoracic cavity and heart shift to the right |
| 61 | Local fetal echogenic bowel | Fetal tricuspid regurgitation and hyperechoic left ventricle |
| 62 | Fetal echogenic bowel | Twin pregnancy, ventricular septal defects, cystic hygroma and talipes varus strephenopodia of the left foot of a fetus |
| 63 | Fetal echogenic bowel | Twin pregnancy, ventricular septal defects, cystic hygroma and talipes varus strephenopodia of the left foot of a fetus |
| 64 | Fetal echogenic bowel | Separation of the bilateral renal collecting system |
| 65 | Echogenicity of partial fetal bowel | Oligohydramnios and fetal growth restriction |
| 66 | Local fetal echogenic bowel | Mild fetal tricuspid regurgitation |
| 67 | Fetal echogenic bowel | Absence of fetal gallbladder |
| 68 | Fetal echogenic bowel | Aberrant subclavian artery |
| 69 | Local fetal echogenic bowel | Fetal tricuspid regurgitation |
| 70 | Fetal echogenic bowel | Mild fetal tricuspid regurgitation |
| 71 | Fetal echogenic bowel | Fetal tricuspid regurgitation |
| 72 | Fetal echogenic bowel | Bilateral choroid plexus cyst and fetal tricuspid regurgitation |
| 73 | Fetal echogenic bowel | Mild pulmonary valve regurgitation |
| 74 | Fetal echogenic bowel | Fetal right ventricular broadening |
| 75 | Fetal echogenic bowel | Fluid-containing lesions in the fetal brain midline, and suspected superior cerebellar cistern |
| 76 | Fetal echogenic bowel | Mitral regurgitation and tricuspid regurgitation |
| 77 | Echogenicity of partial fetal bowel | Hyperechoic left ventricle |
| 78 | Fetal echogenic bowel | Fetal tricuspid regurgitation |
| 79 | Fetal echogenic bowel | Separation of the renal collecting system |
| 80 | Local fetal echogenic bowel | Double renal pelvis of the right kidney |
| 81 | Fetal echogenic bowel | Mild fetal tricuspid regurgitation and persistent right umbilical vein |
| 82 | Fetal echogenic bowel | Fetal bilateral ventricular broadening |
| 83 | Fetal echogenic bowel | Hyperechoic ventricle and separatoin of bilateral renal collecting systems |
| 84 | Fetal echogenic bowel | Fetal pleural effusion and increased blood flow resistance in the umbilical cord |
| 85 | Fetal echogenic bowel | Hyperechoic left ventricle |
| 86 | Fetal echogenic bowel | Fetal gallbladder enlargement and hyperechoic left ventricle |
| 87 | Fetal echogenic bowel | Fetal ventricular septal defects |
| 88 | Fetal echogenic bowel | Fetal ventricular septal defects and tricuspid regurgitation |
| 89 | Fetal echogenic bowel | Fetal ventricular septal defects, separation of the bilateral renal collecting systems and tricuspid regurgitation |
| 90 | Fetal echogenic bowel | Fetal growth restriction and fetal ventricular septal defects |
| 91 | Fetal echogenic bowel | Fetal biparietal diameter and head circumstance smaller than 2SD, and hyperechoic ventricle |
| 92 | Local fetal echogenic bowel | Abnormal blood flow of the fetal middle cerebral artery and umbilical artery |
| 93 | Fetal echogenic bowel | Tricuspid regurgitation and separation of the right renal collecting system |
| 94 | Fetal echogenic bowel | Fetal tricuspid regurgitation |
| 95 | Fetal echogenic bowel | Fetal cardiac enlargement, tricuspid regurgitation, bilateral pulmonary hypoplasia and A-wave reversal of venous catheter |
| 96 | Echogenicity of partial fetal bowel | Fetal left ventricular broadening |
| 97 | Echogenicity of partial fetal bowel | Posterior fossa cistern widening and left pyelectasis |
| 98 | Fetal echogenic bowel | Fetal growth restriction and fetal hyperechoic left ventricle |
| 99 | Fetal echogenic bowel | Fetal hyperechoic left ventricle |
| 100 | Fetal echogenic bowel | Fetal growth restriction |
| 101 | Echogenicity of partial fetal bowel | Separation of bilateral renal pelvis |
| 102 | Local fetal echogenic bowel | Fetal bilateral pleural effusions, mitral regurgitation and tricuspid regurgitation |
| 103 | Local fetal echogenic bowel | Fetal hyperechoic left ventricle |
| 104 | Fetal echogenic bowel | Fetal nuchal translucency of 2.7 mm, a few peritoneal effusion and small gastric bubble |
| 105 | Local fetal echogenic bowel | Fetal tricuspid regurgitation and separation of bilateral renal collecting systems |
| 106 | Fetal echogenic bowel | Fetal nuchal translucency of 3.3 mm, |
| 107 | Fetal echogenic bowel | Fetal growth restriction |
| 108 | Local fetal echogenic bowel | Fetal cardiovascular dysplasia, right-sided aortic arch and aberrant left subclavian artery |
| 109 | Fetal echogenic bowel | Fetal hyperechoic left ventricle |
| 110 | Local fetal echogenic bowel | Separation of bilateral kidneys |
| 111 | Local fetal echogenic bowel | Echoless area in the posterior part of the brain midline |
| 112 | Fetal echogenic bowel | Fetal tricuspid regurgitation |
| 113 | Echogenicity of partial fetal bowel | Fetal left ventricular broadening |
| 114 | Fetal echogenic bowel | Fetal tricuspid regurgitation |
| 115 | Fetal echogenic bowel | Fetal ventricular septal defects and right-sided aortic arch |
| 116 | Fetal echogenic bowel | Polyhydramnios |
| 117 | Fetal echogenic bowel | Fetal ventricular septal defects and hyperechoic left ventricle |
| 118 | Fetal echogenic bowel | Fetal hyperechoic left ventricle |
| 119 | Local fetal echogenic bowel | Fetal tricuspid regurgitation |
| 120 | Fetal echogenic bowel | Fetal ventricular septal defects, separation of bilateral renal collecting systems and tricuspid regurgitation |
| 121 | Local fetal echogenic bowel | Fetal hyperechoic left ventricle |
| 122 | Echogenicity of partial fetal bowel | Fetal left ventricular broadening |
| 123 | Local fetal echogenic bowel | Full anterior horn of the fetal left ventricle |
| 124 | Fetal echogenic bowel | Fetal tricuspid regurgitation |
| 125 | Fetal echogenic bowel | Fetal hyperechoic left and right ventricles |
| 126 | Fetal echogenic bowel | Fetal hyperechoic left ventricle |
| 127 | Fetal echogenic bowel | Fetal persistent left superior vena cava, fetal hyperechoic left ventricle and separation of bilateral renal collecting systems |
